# Supplementary material
Source: PubMed Central journal article supplement (PMC5069506)
Supplement: rspb20161207supp10.pdf [file rspb20161207supp10.pdf]

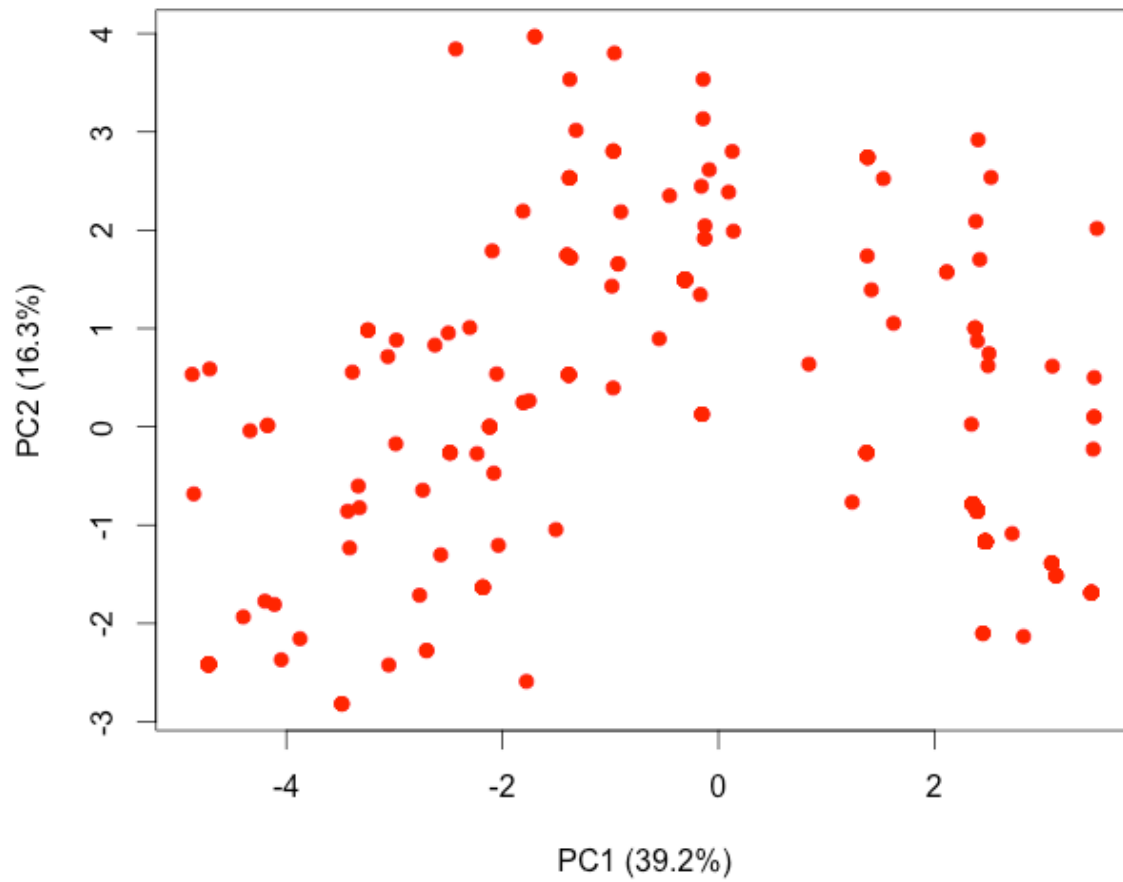

**Figure SI 1. PCA of dietary variables (data from Kissling et al., 2014)**

**Dietary Loadings (Note that only PC1-PC5 are shown)**

|              | PC1          | PC2          | PC3          | PC4          | PC5          |
|--------------|--------------|--------------|--------------|--------------|--------------|
| Vertebrate   | -0.366672292 | -0.263801381 | -0.348437848 | -0.042474578 | 0.038295708  |
| Mammal       | -0.309538803 | -0.322851003 | -0.17786135  | -0.006276887 | -0.357704823 |
| Bird         | -0.173616267 | -0.214346576 | -0.400478695 | -0.036622327 | -0.086485187 |
| Herptile     | -0.261368781 | -0.180670421 | -0.23297021  | -0.060846534 | -0.025577865 |
| Fish         | -0.054155676 | -0.01792445  | -0.038899805 | -0.021154972 | 0.052111122  |
| Invertebrate | -0.410866882 | 0.133546615  | 0.121079804  | -0.030543236 | 0.751220013  |
| Seed         | 0.014104916  | 0.233053973  | -0.083113163 | -0.047134094 | -0.137208758 |
| Fruit        | 0.008259638  | 0.595916725  | -0.664561415 | -0.099304125 | 0.091795132  |
| Nectar       | 0            | -1.36E-20    | 5.42E-20     | 5.55E-17     | 2.22E-16     |
| Root         | 0.000563924  | 0.133671465  | -0.067166375 | -0.075092202 | -0.096108052 |
| Leaf         | 0.507761536  | -0.130940942 | -0.200808943 | -0.069350864 | -0.056800373 |
| Woody        | 0.327092956  | -0.173353897 | -0.319691884 | 0.707422601  | 0.304222951  |
| Herbaceous   | 0.366649452  | -0.300677204 | -0.142631459 | -0.678047184 | 0.334124982  |
| Other        | -0.005058768 | 0.405624183  | 0.013882674  | -0.094902894 | -0.226920624 |

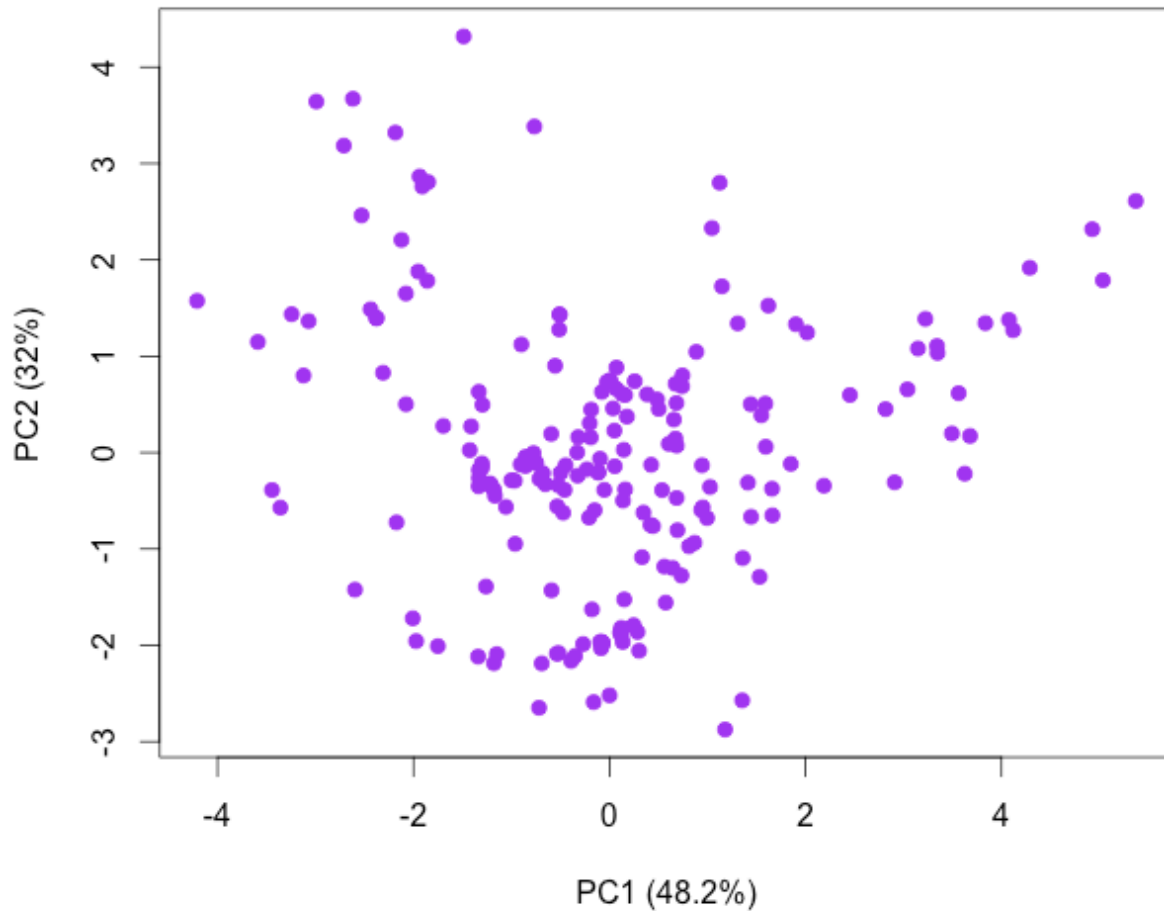

**Figure SI 2. PCA of modern climate variables.**

**Modern Loadings**

|               | PC1          | PC2          | PC3          | PC4          | PC5          | PC6         |
|---------------|--------------|--------------|--------------|--------------|--------------|-------------|
| BIO1_Mod_Avg  | 0.191978965  | -0.588852448 | -0.552780728 | 0.198454915  | -0.148191833 | -0.4994849  |
| BIO4_Mod_Avg  | -0.489889293 | 0.157158506  | -0.505414229 | 0.472895453  | -0.2409748   | 0.445159722 |
| BIO6_Mod_Avg  | 0.493177592  | -0.341895861 | -0.189387724 | -0.296268783 | -0.093835397 | 0.712344789 |
| BIO12_Mod_Avg | 0.497513262  | 0.113013     | 0.377997825  | 0.643945867  | -0.426236259 | 0.021968914 |
| BIO14_Mod_Avg | 0.422650875  | 0.393856663  | -0.360843349 | 0.267273793  | 0.681614194  | 0.001433494 |
| BIO15_Mod_Avg | -0.23189483  | -0.586315793 | 0.360599411  | 0.403867288  | 0.514674642  | 0.210779196 |

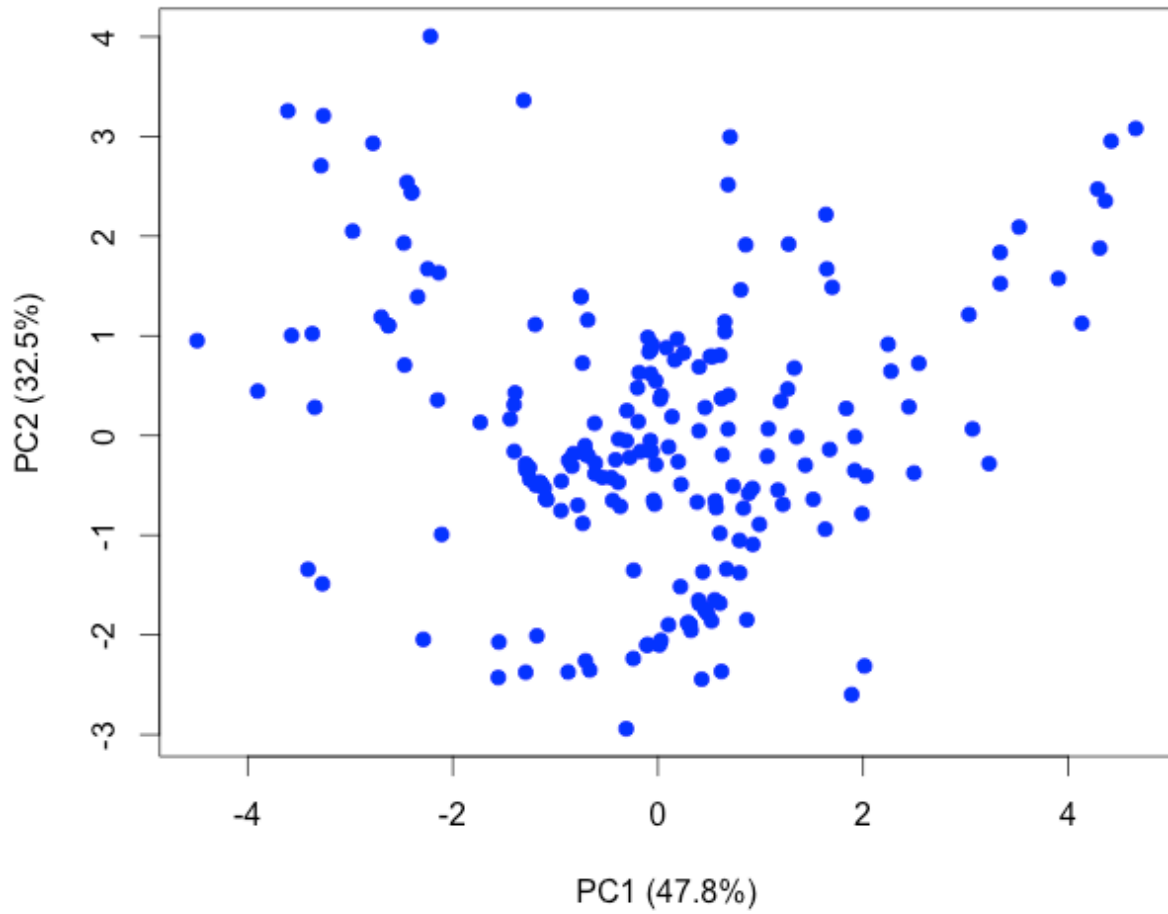

**Figure SI 3. PCA of mid-Holocene climate variables.**

**Mid-Holocene Loadings**

|               | PC1          | PC2          | PC3          | PC4          | PC5          | PC6          |
|---------------|--------------|--------------|--------------|--------------|--------------|--------------|
| BIO1_Hol_Avg  | 0.264096796  | -0.545238239 | -0.588865557 | 0.110113865  | 0.134370847  | 0.505989044  |
| BIO4_Hol_Avg  | -0.507428071 | 0.054570056  | -0.551104743 | 0.423306879  | 0.203553467  | -0.463896213 |
| BIO6_Hol_Avg  | 0.533545279  | -0.219421549 | -0.176679324 | -0.384630112 | 0.161384615  | -0.679693106 |
| BIO12_Hol_Avg | 0.50199527   | 0.091973348  | 0.289335262  | 0.752460934  | 0.291697462  | -0.067393559 |
| BIO14_Hol_Avg | 0.349272264  | 0.474745579  | -0.418332534 | 0.13221105   | -0.678310377 | -0.006219488 |
| BIO15_Hol_Avg | -0.118780071 | -0.646335125 | 0.244107212  | 0.277612466  | -0.607678443 | -0.249423531 |

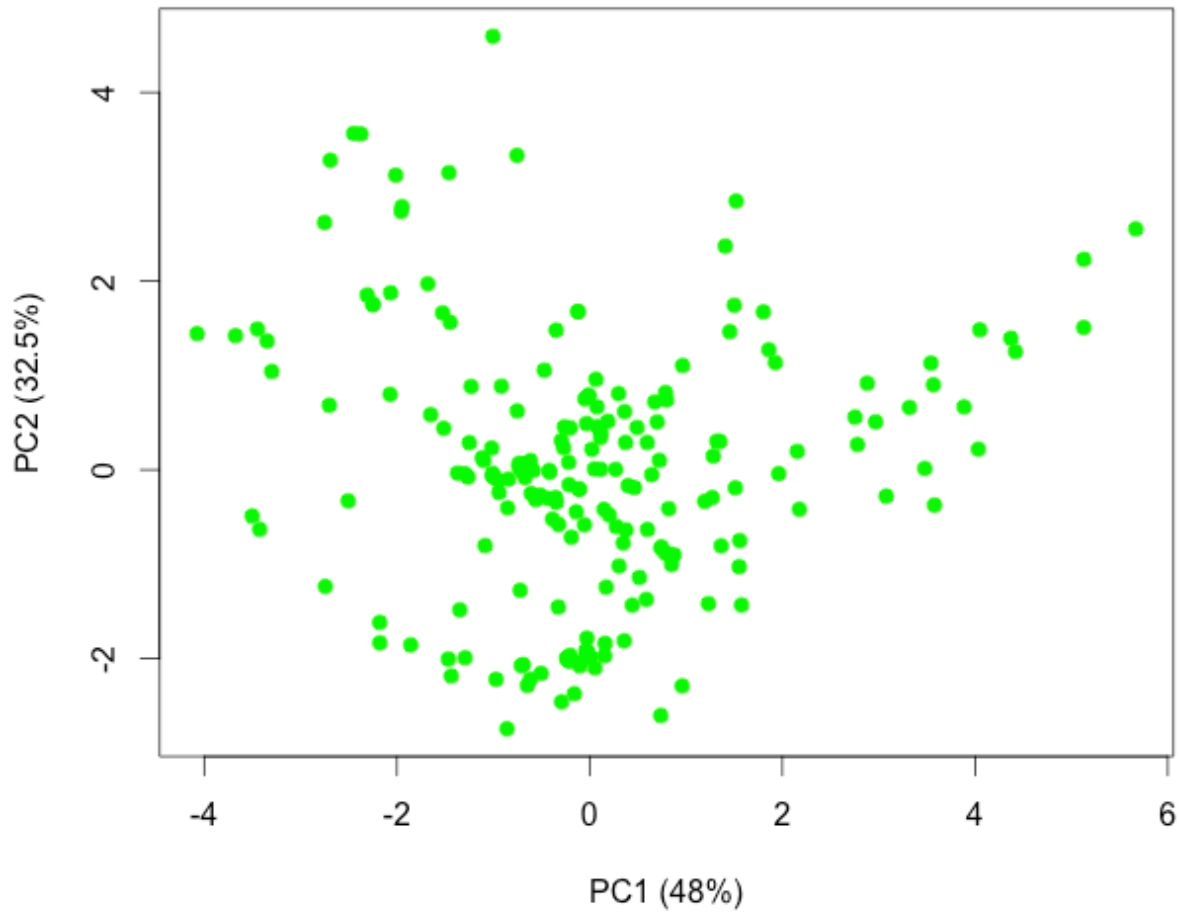

**Figure SI 4. PCA of LGM climate variables.**

### LGM Loadings

|               | PC1          | PC2          | PC3          | PC4          | PC5          | PC6          |
|---------------|--------------|--------------|--------------|--------------|--------------|--------------|
| BIO1_LGM_Avg  | 0.18851477   | -0.602067057 | -0.502626662 | 0.188123581  | -0.140981754 | -0.542289168 |
| BIO4_LGM_Avg  | -0.475347643 | 0.178204245  | -0.538289026 | 0.482871747  | -0.279328259 | 0.375956632  |
| BIO6_LGM_Avg  | 0.475185989  | -0.385027591 | -0.186550694 | -0.236409471 | -0.135899283 | 0.718883033  |
| BIO12_LGM_Avg | 0.490768653  | 0.12939913   | 0.395651029  | 0.658066023  | -0.390785821 | -0.009889858 |
| BIO14_LGM_Avg | 0.437981359  | 0.368677647  | -0.392306436 | 0.239956754  | 0.67866571   | 0.013356353  |
| BIO15_LGM_Avg | -0.282884312 | -0.552127628 | 0.335210567  | 0.430028862  | 0.519933216  | 0.217968008  |

**Figure SI 5.  
Barplot of  
Sum of AICc  
Weights**

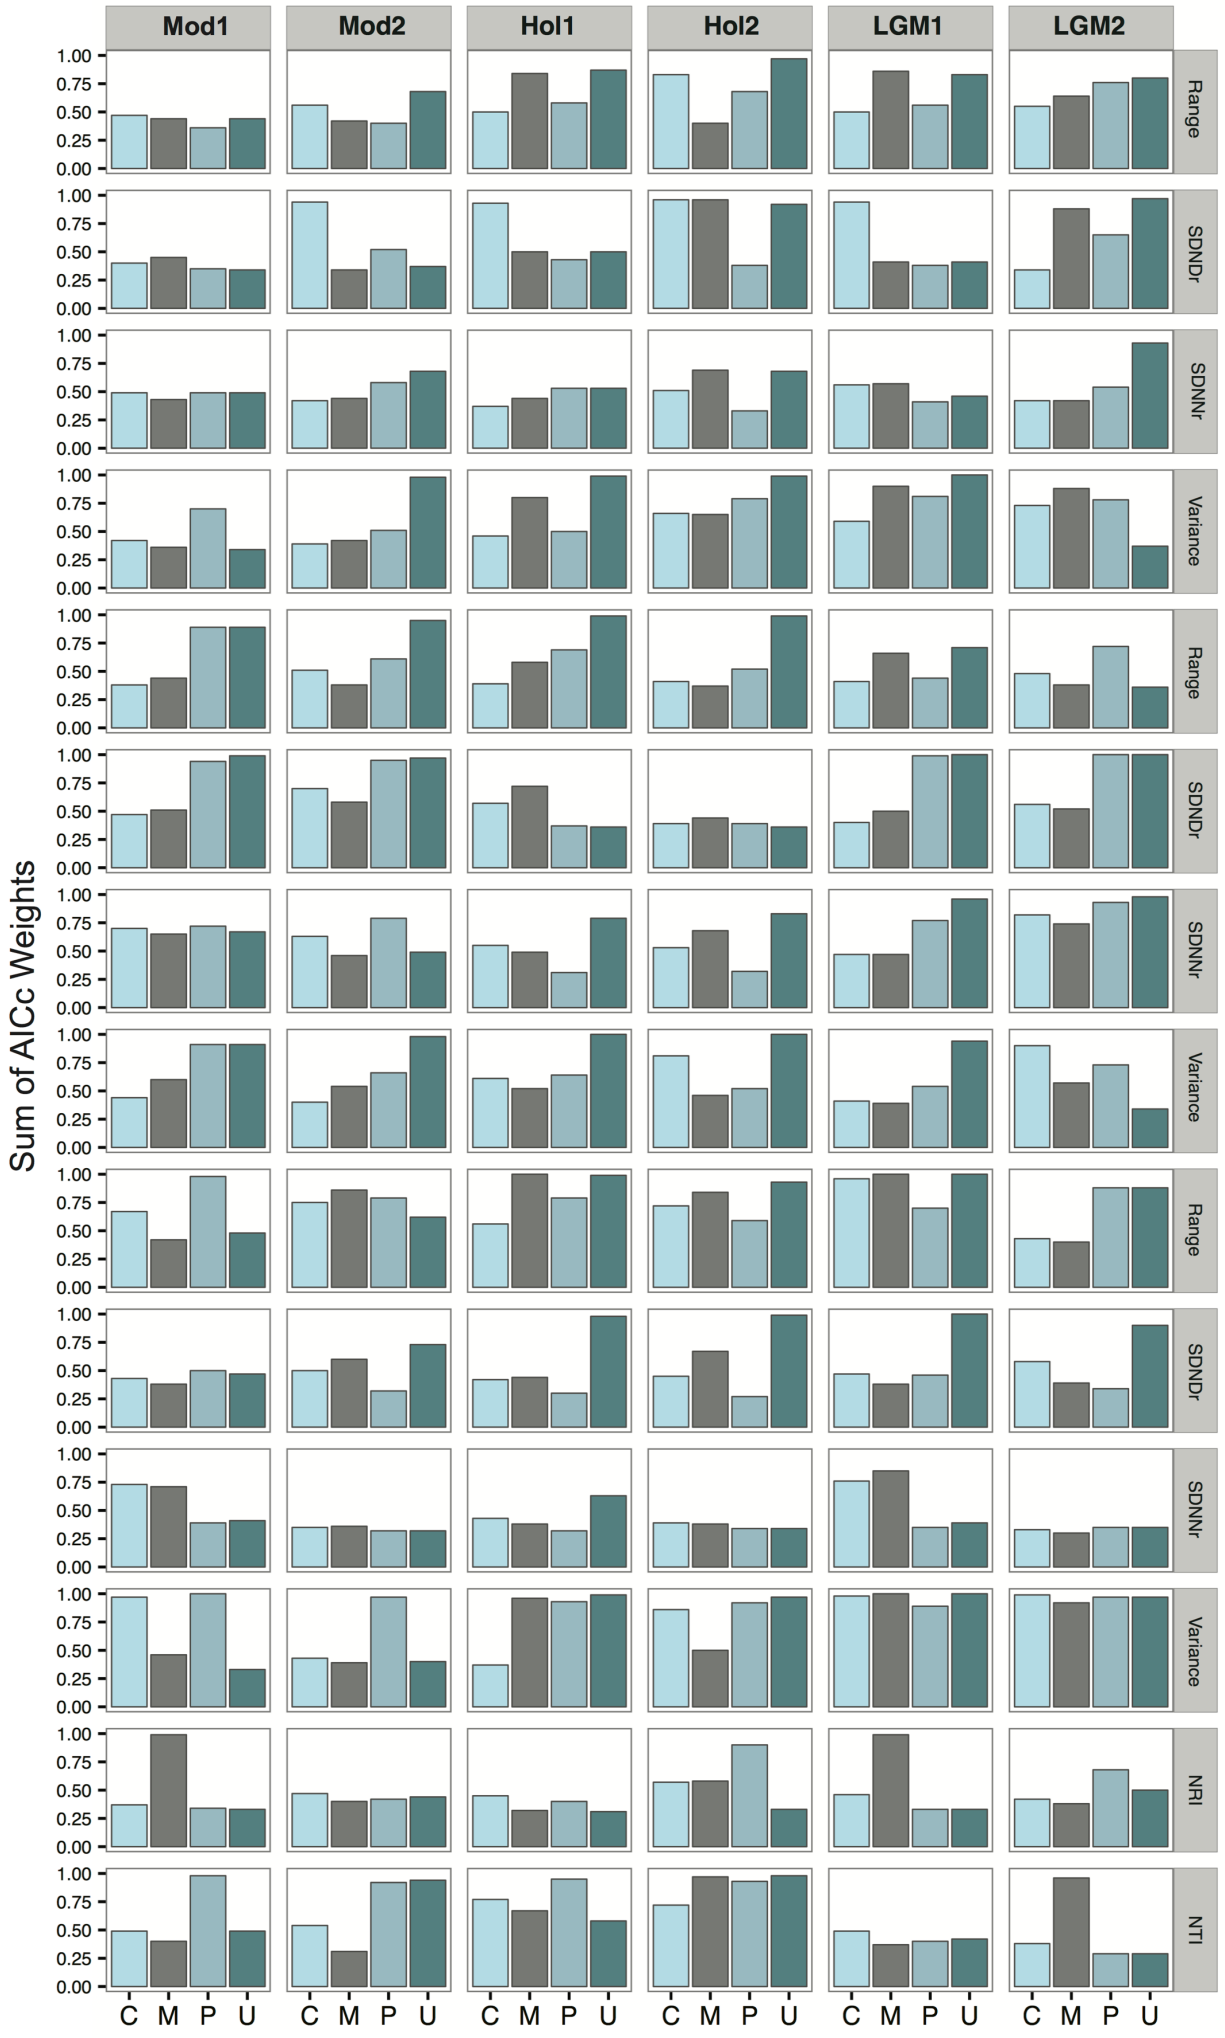

**Body Mass**

**Diet PC1**

**Diet PC2**

**Community**

- Mammals (M)
- Carnivorans (C)
- Primates (P)
- Ungulates (U)
